# Supplementary material
Source: PubMed Central journal article supplement (PMC5842911)

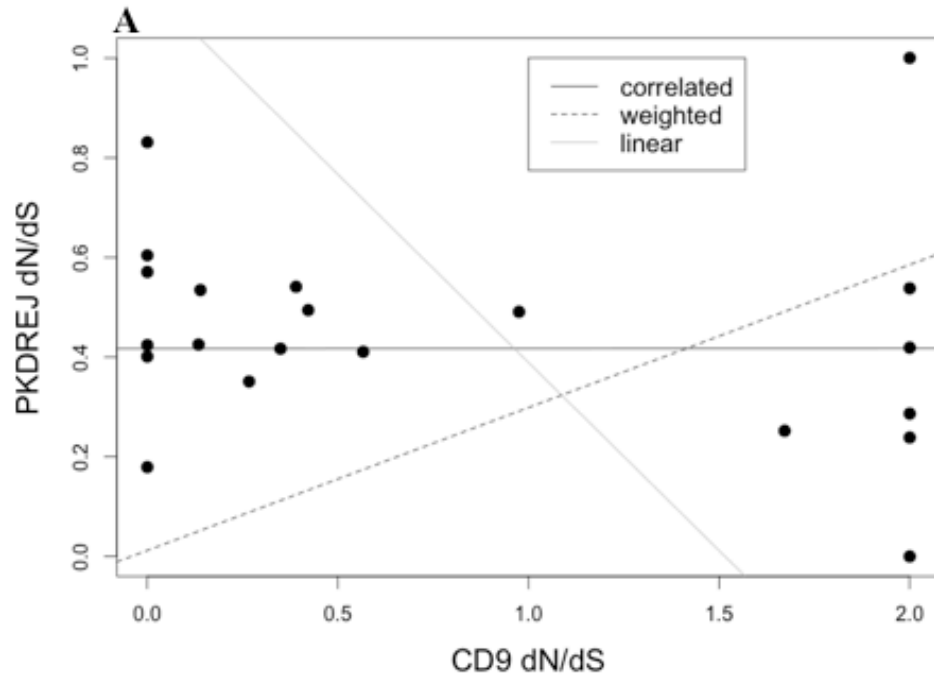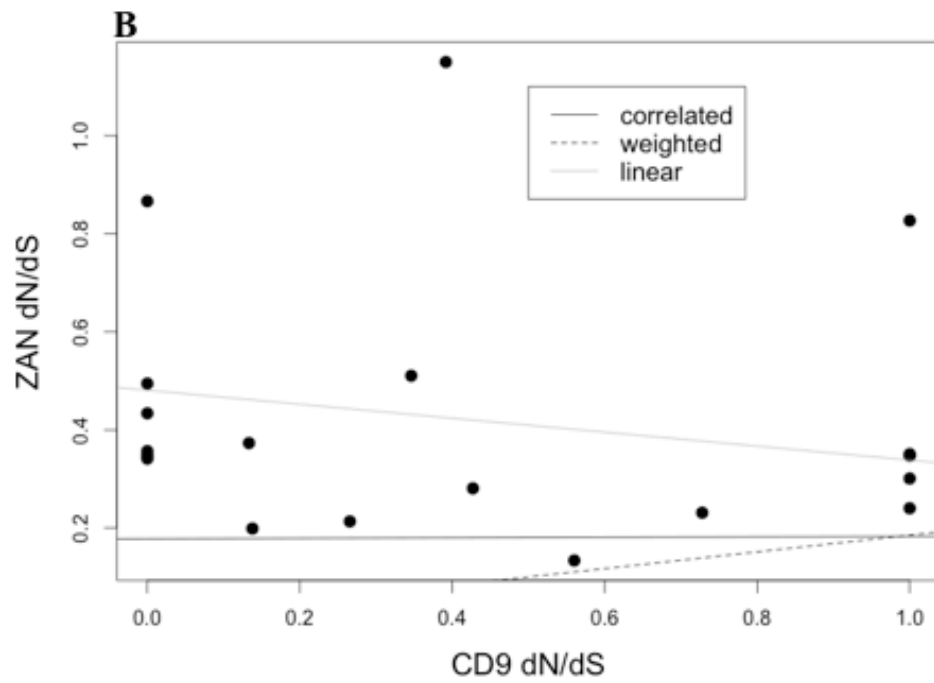

Supplement: NIHMS947009-supplement-suppl.pdf [file NIHMS947009-supplement-suppl.pdf]
